# Supplementary material for: Effect of cell permeability and dehydrogenase expression on octane activation by CYP153A6-based whole cell Escherichia coli catalysts
Source: PubMed Central journal article supplement (PMC5607502; doi:10.1186/s12934-017-0763-0), 2017-09-20

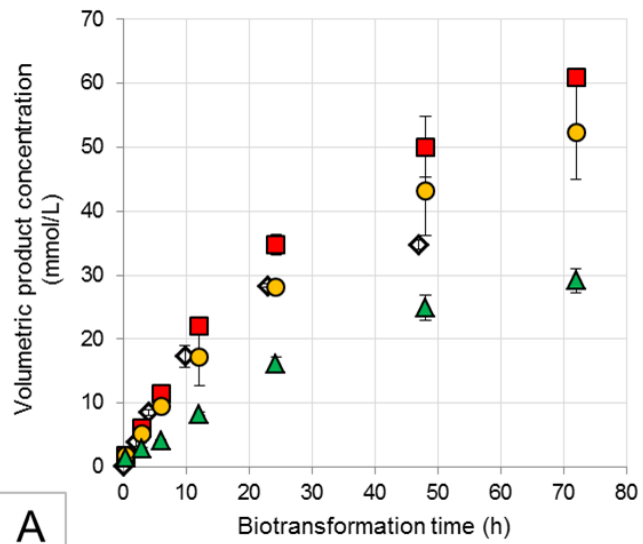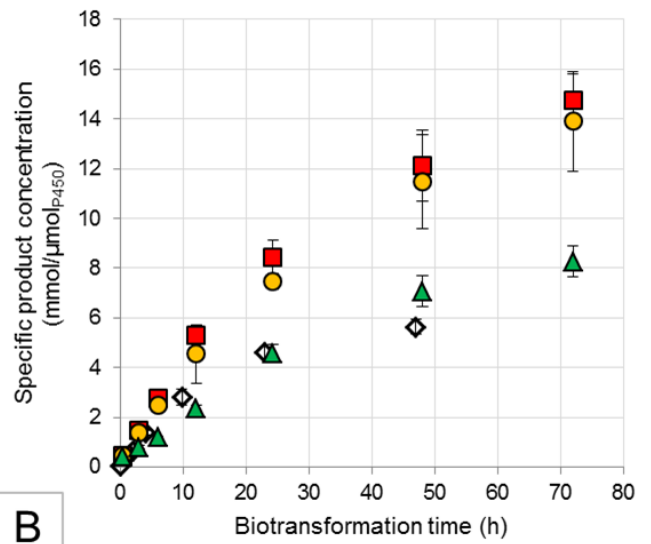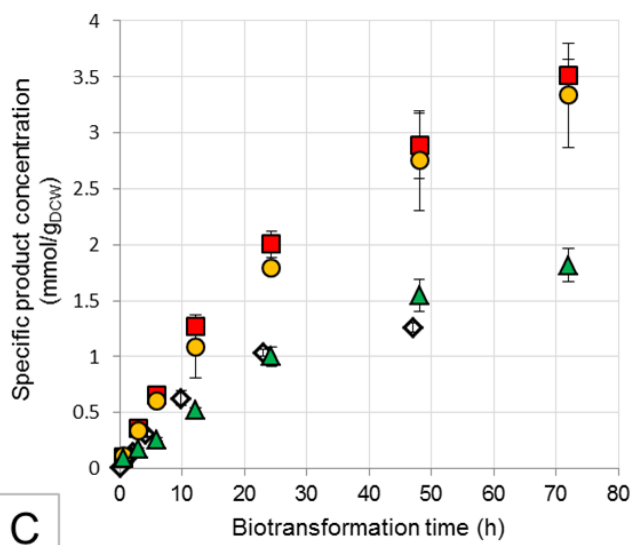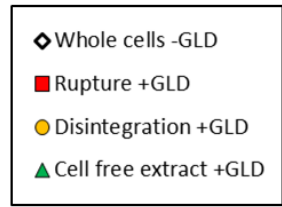

Supplement: 12934_2017_763_MOESM2_ESM.pdf [file 12934_2017_763_MOESM2_ESM.pdf]
